# Supplementary material for: SIAH2 regulates DNA end resection and replication fork recovery by promoting CtIP ubiquitination
Source: PubMed Central journal article supplement (PMC9561274; doi:10.1093/nar/gkac808), 2022-09-26
Supplement: gkac808_supplemental_file.pdf [file gkac808_supplemental_file.pdf]

**SIAH2 regulates DNA end resection and replication fork recovery by promoting CtIP ubiquitination**

7 supplementary figures

2 supplementary tables

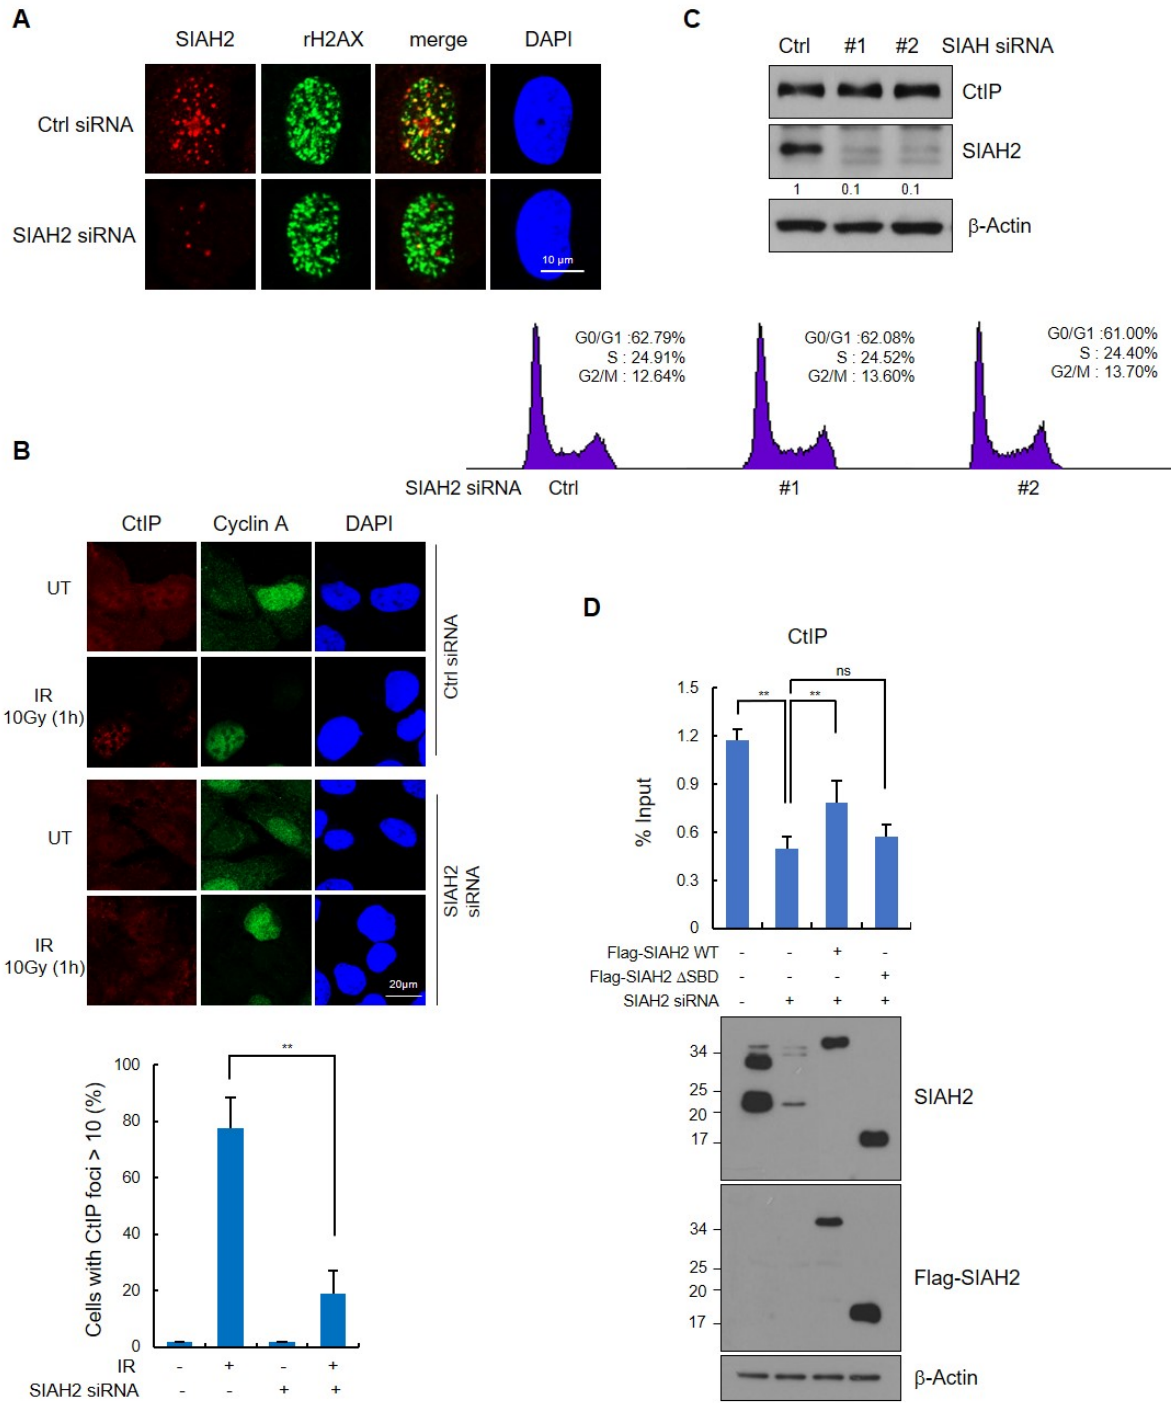

**Figure S1. SIAH2 contributes to CtIP recruitment at DSB sites.**

(A) Control and SIAH2-depleted HeLa cells were treated with 5 Gy IR, fixed at 1 h, and immunostained with anti-SIAH2 antibody. DNA was stained with DAPI. (B) Control and SIAH2-

depleted HeLa cells were either untreated or treated with 5 Gy IR, fixed at 1 h, and immunostained with anti-CtIP and anti-Cyclin A (S/G2 marker) antibodies. DNA was stained with DAPI. CtIP foci were analyzed in Cyclin A-positive cells. Representative images and the percentage of cells containing >10 CtIP foci are shown. Data represent mean  $\pm$  SD (n = 3), \*\*  $P < 0.01$ , two-tailed Student's *t*-test. **(C)** Cell cycle distribution in control and SIAH2 siRNA-transfected HeLa cells. The numbers were relative levels of SIAH2 expression compared to control siRNA-transfected cells. **(D)** Control DR-GFP-U2OS cells, SIAH2-depleted DR-GFP-U2OS cells, and SIAH2 knockdown DR-GFP-U2OS cells reconstituted with Flag-SIAH2 WT or Flag-SIAH2  $\Delta$ SBD were transfected with an I-SceI expression plasmid for up to 8 h. ChIP experiments were performed using an anti-CtIP antibody. Whole cell lysates were analyzed by immunoblotting using the indicated antibodies. The numbers were relative levels of SIAH2 expression compared to control siRNA-transfected cells. Data represent mean  $\pm$  SD (n = 3), \*\*  $P < 0.01$ . Statistical analysis was performed with the two-tailed Student's *t*-test.

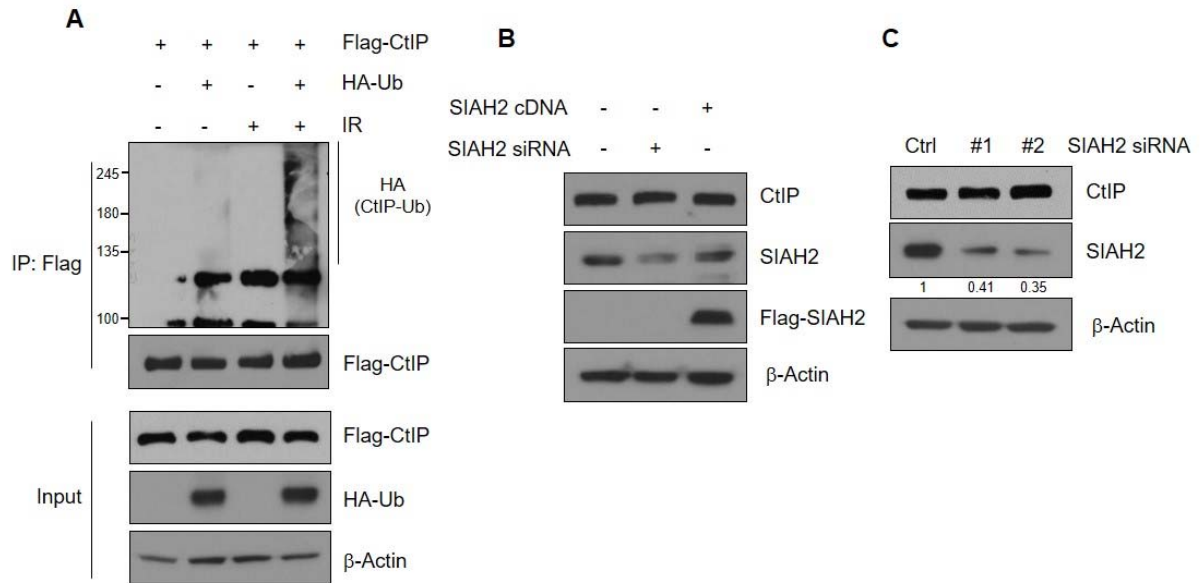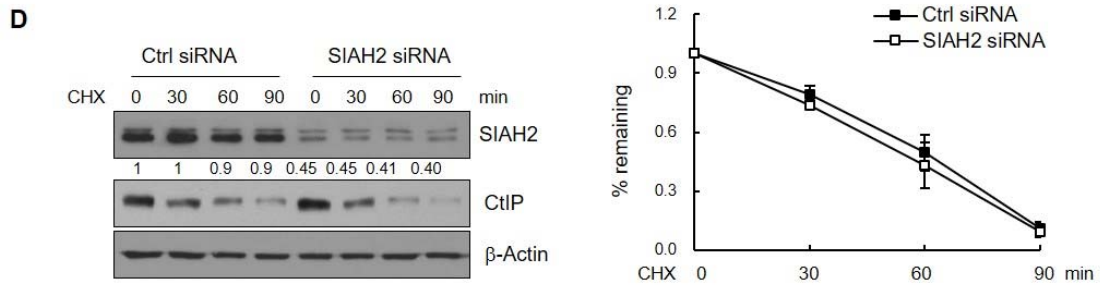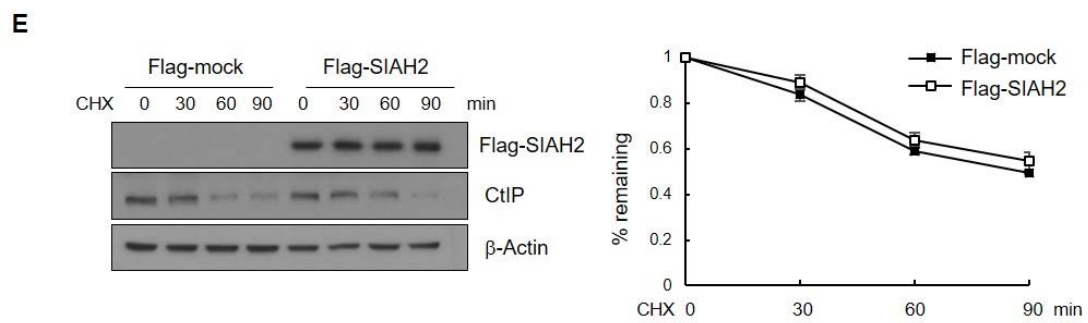

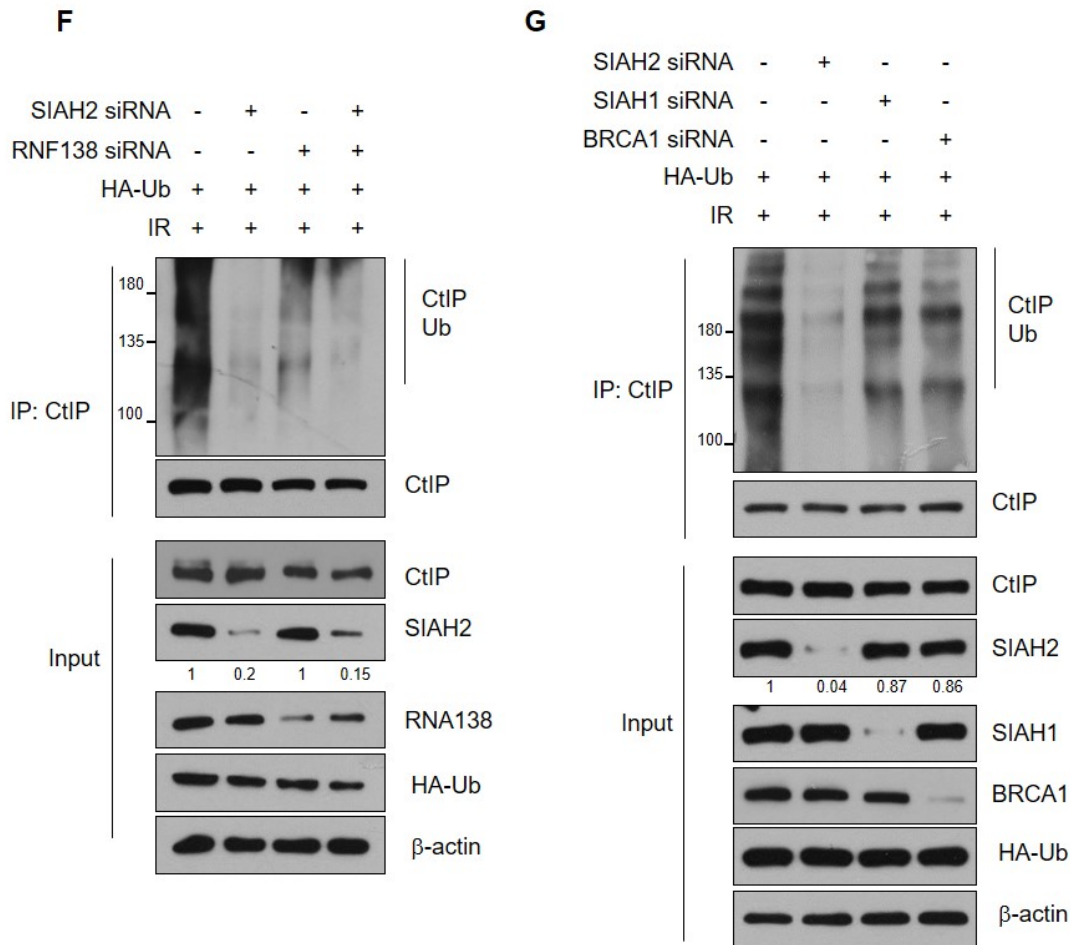

**Figure S2. SIAH2 ubiquitinates CtIP.**

(A) HEK293T cells expressing Flag-CtIP were transfected with or without HA-ubiquitin and were either untreated or treated with 10 Gy of IR for 30 minutes. Total cell lysates were immunoprecipitated with anti-Flag antibody and immunoblotted with the indicated antibodies. (B) HeLa cells were transfected with either Flag-SIAH2 or SIAH2 siRNA. 48 h later, total cell lysates were immunoblotted with the indicated antibodies. (C) HeLa cells were transfected with either a scrambled negative control siRNA or two different siRNAs against SIAH2 (#1 and #2). 48 h later, total cell lysates were immunoblotted with the indicated antibodies. The numbers were relative levels of SIAH2 expression compared to control siRNA-transfected cells. (D) CtIP protein stability 48 h after transfection of cells with either control siRNA or SIAH2 siRNA following cycloheximide treatment (10  $\mu$ g/ml) for the times indicated. Data are shown as mean  $\pm$  SD. (E)

CtIP protein stability 48 h after transfection of cells with either control vector or Flag-SIAH2 expression vector following cycloheximide treatment (10  $\mu$ g/ml) for the times indicated. Data are shown as mean  $\pm$  SD. **(F)** HeLa cells cotransfected with HA-ubiquitin and either a scrambled negative control siRNA, siRNAs against SIAH2 or RNF138, or both SIAH2 and RNF138 siRNAs were treated with 10 Gy IR for 30 minutes. Total cell lysates were immunoprecipitated with anti-CtIP antibody and immunoblotted with the indicated antibodies. **(G)** HeLa cells cotransfected with HA-ubiquitin and either a scrambled negative control siRNA or siRNAs against SIAH2, SIAH1, or BRCA1 were treated with 10 Gy IR for 30 minutes. Total cell lysates were immunoprecipitated with anti-CtIP antibody and immunoblotted with the indicated antibodies.

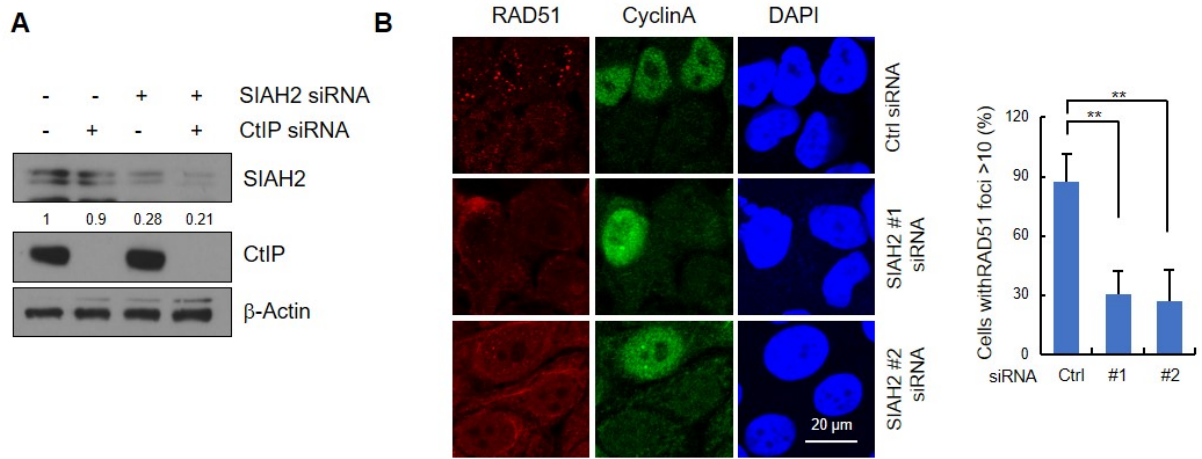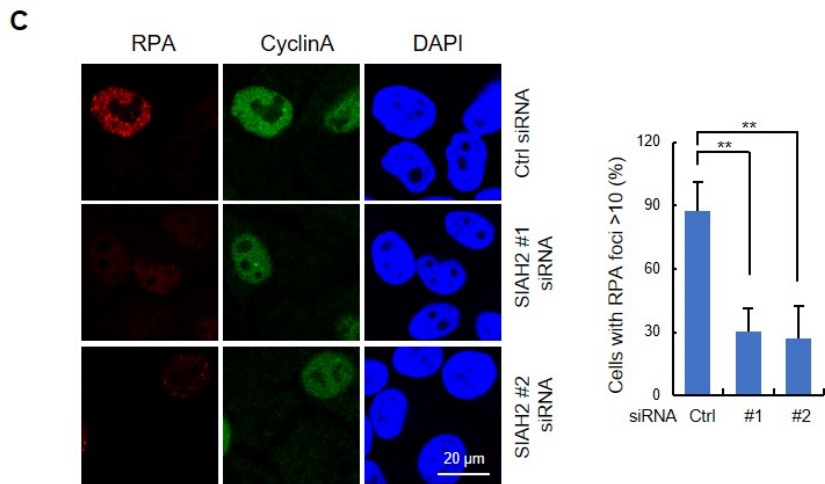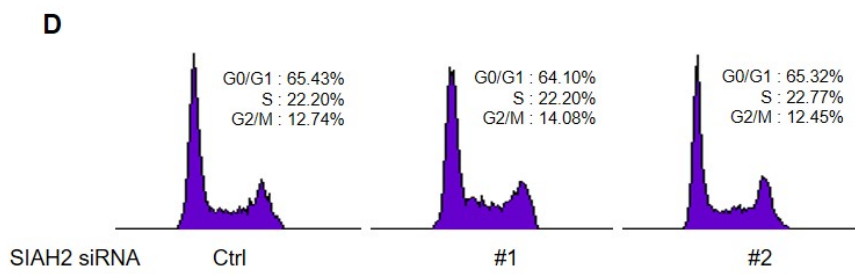

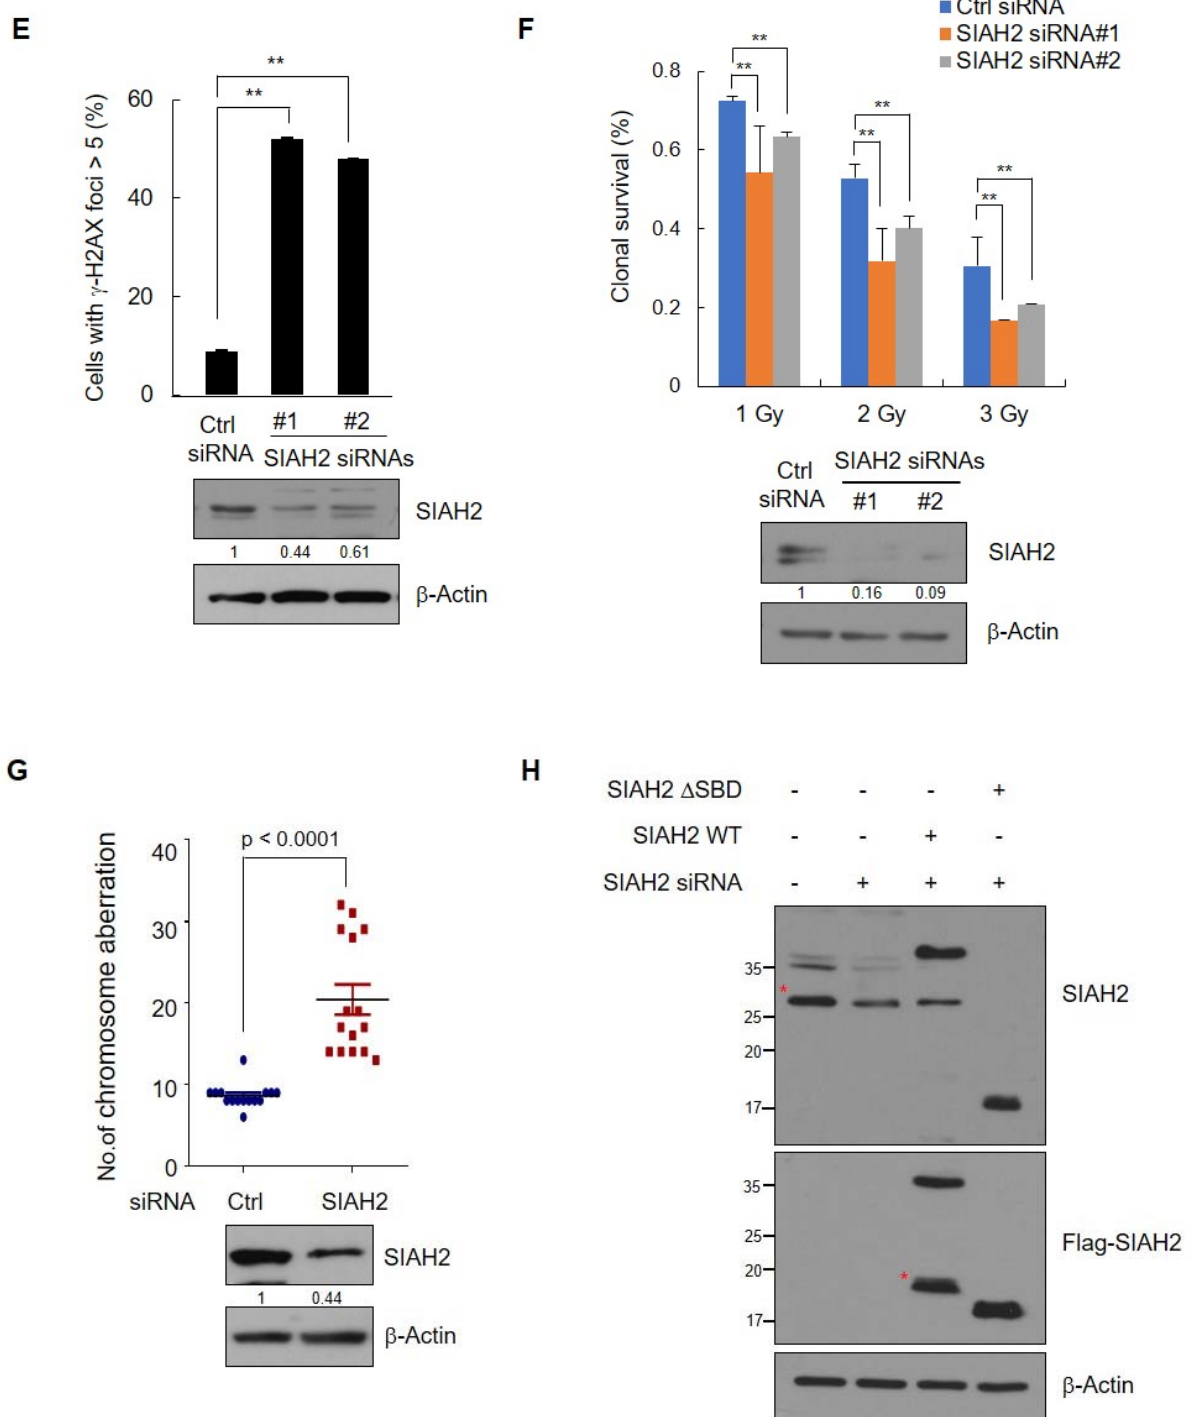

**Figure S3. SIAH2 maintains genomic stability.**

(A) The expression levels of SIAH2 and CtIP in AsiSI-ER-U2OS cells transfected with either control siRNA or siRNAs against CtIP, SIAH2, or both SIAH2 and CtIP. The numbers were



relative levels of SIAH2 expression compared to control siRNA-transfected cells. **(B, C)** HeLa cells transfected with either control siRNA or two different SIAH2-target siRNAs were treated with or without 5 Gy IR, fixed at 3 h, and immunostained with anti-RAD51 and anti-Cyclin A antibodies **(B)** or anti-RPA and anti-Cyclin A antibodies **(C)**. DNA was stained with DAPI. RAD51 and RPA foci were analyzed in Cyclin A-positive cells. The percentage of cells containing > 10 foci was calculated. Representative images and quantification of RAD51 and RPA foci are shown. Whole cell lysates were analyzed by immunoblotting using the indicated antibodies. Data represent mean  $\pm$  SD (n = 3), \*\*  $P < 0.01$ , two-tailed Student's *t*-test. **(D)** Cell cycle distribution in control and SIAH2 siRNA-transfected DR-GFP-U2OS cells. The numbers were relative levels of SIAH2 expression compared to control siRNA-transfected cells. **(E)** Control- and SIAH2-depleted HeLa cells were treated with 5 Gy of IR. Cells were fixed at 24 h after IR irradiation and immunostained for  $\gamma$ -H2AX. The percentage of cells with > 5 foci for  $\gamma$ -H2AX is shown. The numbers were relative levels of SIAH2 expression compared to control siRNA-transfected cells. Data represent mean  $\pm$  SD (n = 3), \*\*  $P < 0.01$ . Statistical analysis was performed with the two-tailed Student's *t*-test. **(F)** Colony forming ability of control and SIAH2 knockdown HeLa cells treated with the indicated doses of IR. The numbers were relative levels of SIAH2 expression compared to control siRNA-transfected cells. Survival data is presented as mean  $\pm$  SD (n = 3). \*\*  $P < 0.01$ . Statistical analysis was performed with the two-tailed Student's *t*-test. **(G)** Quantification of chromosomal aberrations in control and SIAH2 knockdown HeLa cells following treatment with 2 Gy IR for 24 h. The numbers were relative levels of SIAH2 expression compared to control siRNA-transfected cells. Data represent mean  $\pm$  SD (n = 3). *P* values between indicated samples were calculated using a Mann-Whitney test. **(H)** The expression levels of endogenous SIAH2 and Flag-SIAH2 in either control or SIAH2-depleted AsiSI-ER-U2OS cells reconstituted with Flag-Mock, Flag-SIAH2 WT, or Flag-SIAH2  $\Delta$ SBD. Asterisks indicate nonspecific bands.

**A**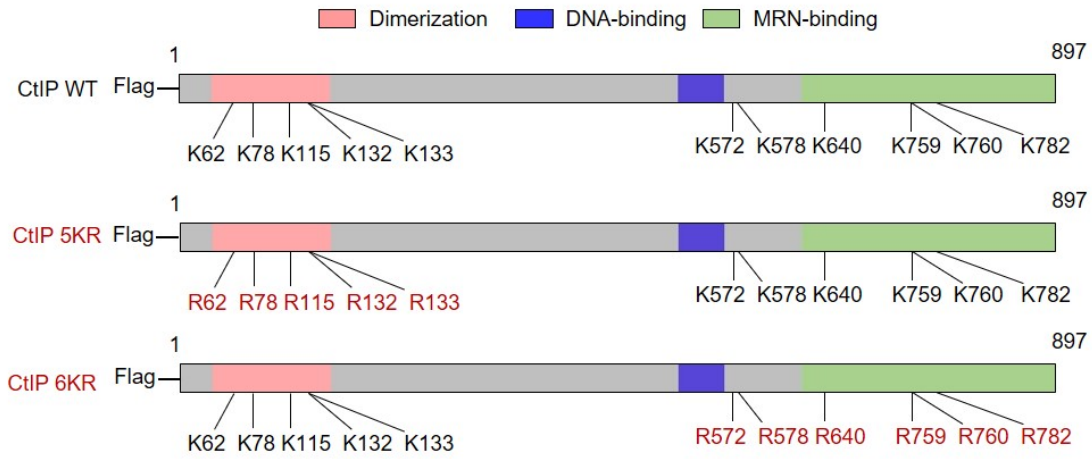**B**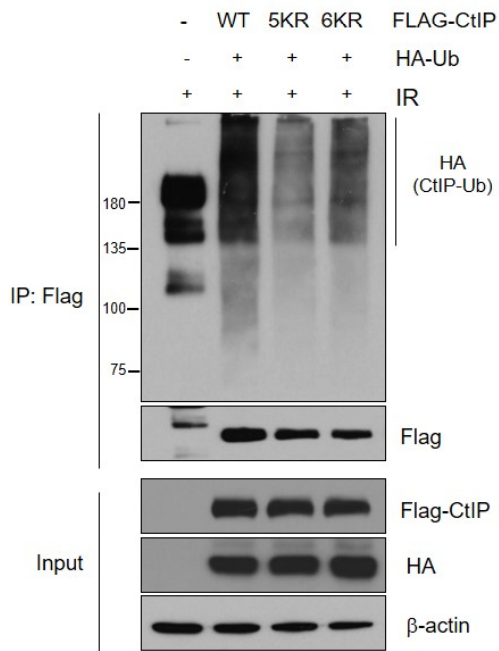**C**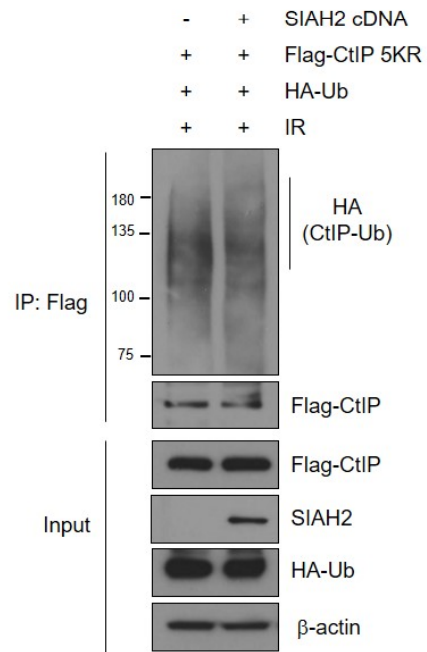

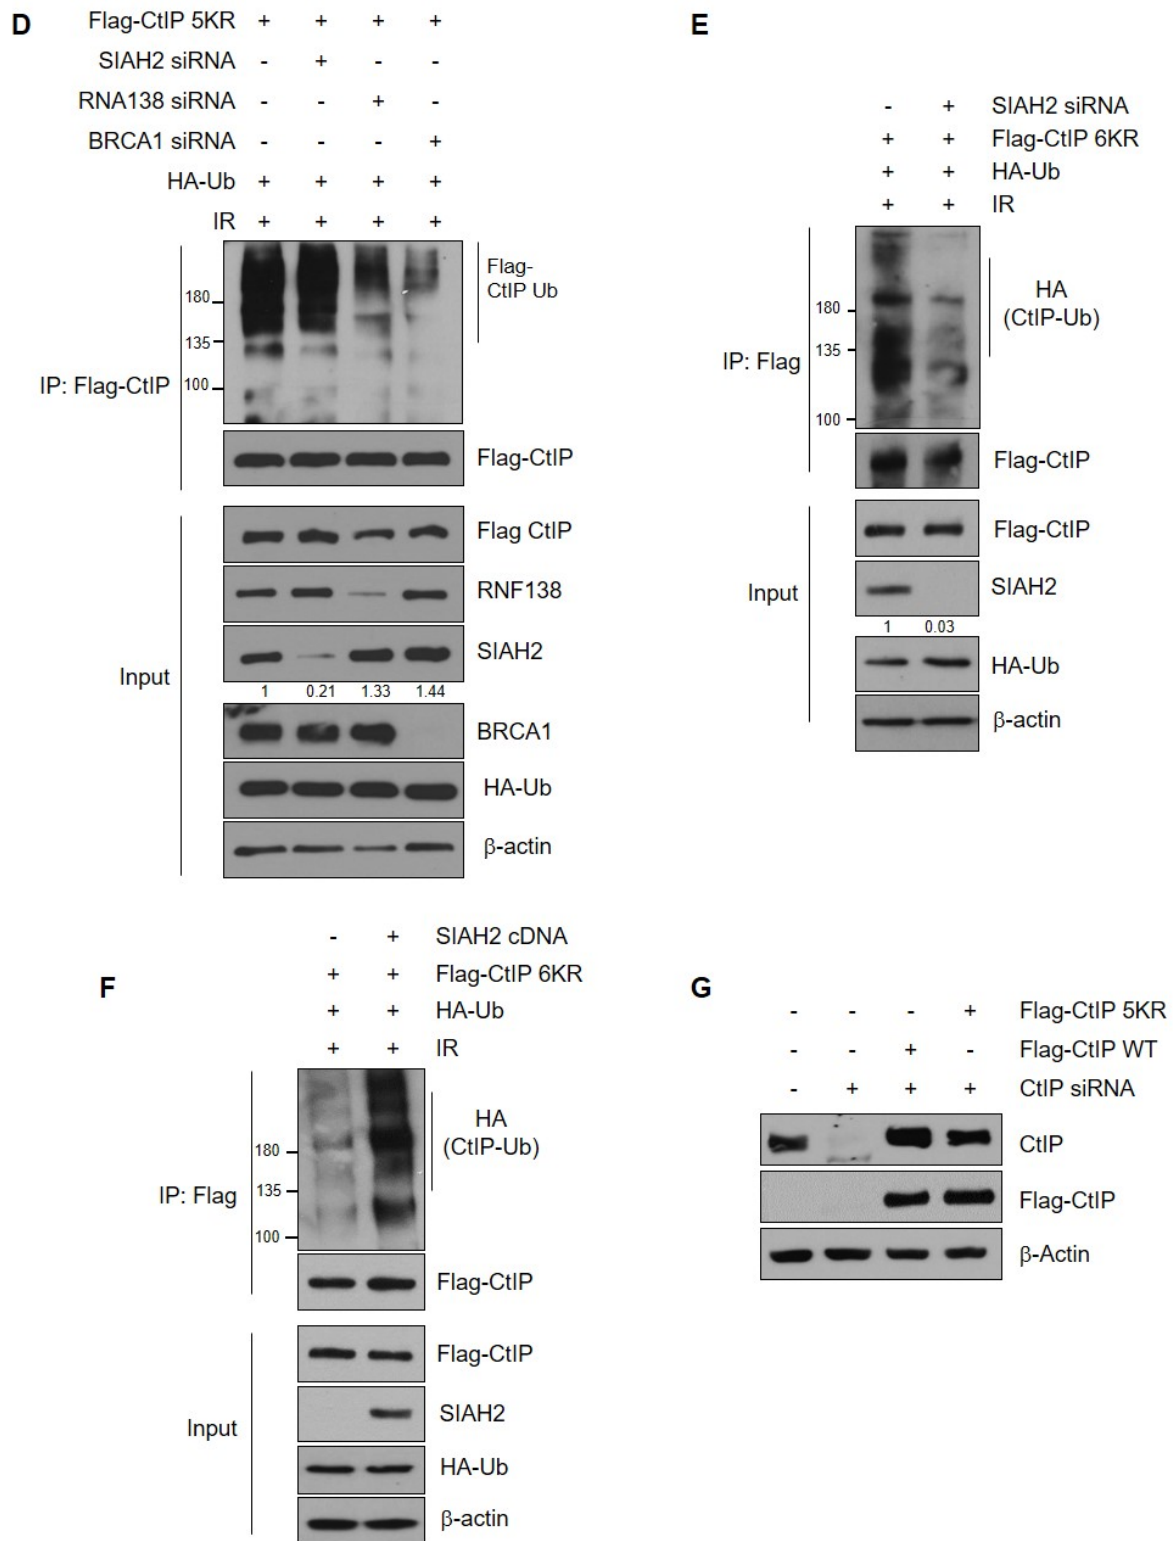

**Figure S4. CtIP is ubiquitinated at five N-terminal lysine residues in response to IR treatment.**

(A) Schematic diagram of CtIP domain structure of wild-type (WT) CtIP and relevant ubiquitination sites in this study, along with substituted in the corresponding site mutants of Flag-tagged CtIP. (B) Control HEK293T cells or HEK293T cells transfected with HA-ubiquitin along with Flag-CtIP WT, Flag-CtIP-5KR, or Flag-CtIP-6KR were treated with 10 Gy IR for 30 minutes. Total cell lysates were immunoprecipitated with anti-Flag antibody and immunoblotted with the indicated antibodies. (C) Flag-CtIP-5KR-expressing HEK293T cells were transfected with HA-ubiquitin with or without SIAH2 and treated with 10 Gy IR for 30 minutes. Total cell lysates were immunoprecipitated with anti-Flag antibody and immunoblotted with the indicated antibodies. (D) Flag-CtIP-5KR-expressing HEK293T cells were transfected with HA-ubiquitin with indicated siRNAs and treated with 10 Gy IR for 30 minutes. Total cell lysates were immunoprecipitated with anti-Flag antibody and immunoblotted with the indicated antibodies. (E) Flag-CtIP-6KR-expressing HEK293T cells were transfected with HA-ubiquitin with control siRNA or SIAH2 siRNA were treated with 10 Gy IR for 30 minutes. Total cell lysates were immunoprecipitated with anti-Flag antibody and immunoblotted with the indicated antibodies. (F) Flag-CtIP-6KR-expressing HEK293T cells were transfected with HA-ubiquitin with or without SIAH2 and treated with 10 Gy IR for 30 minutes. Total cell lysates were immunoprecipitated with anti-Flag antibody and immunoblotted with the indicated antibodies. (G) The expression levels of endogenous CtIP and Flag-CtIP in either control or CtIP-depleted AsiSI-ER-U2OS cells reconstituted with Flag-Mock, Flag-CtIP WT, or Flag-CtIP-5KR.

**A**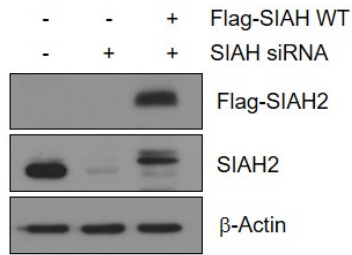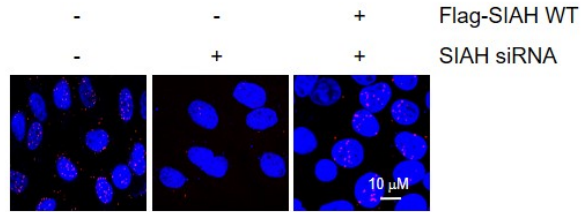**B**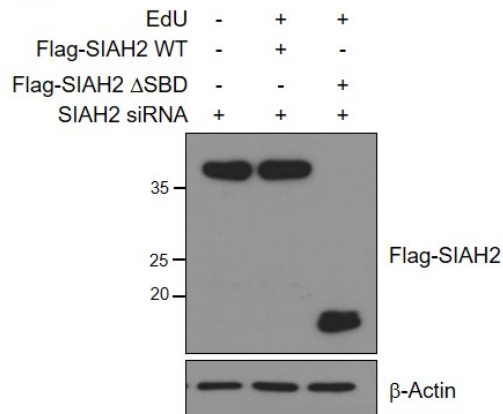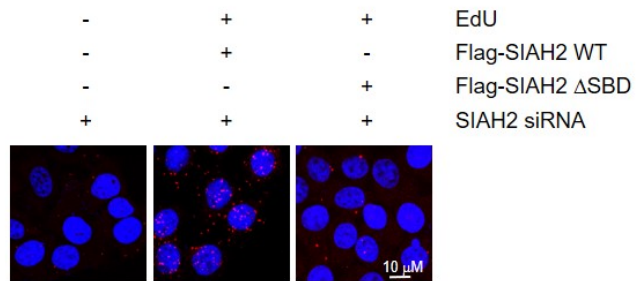**C**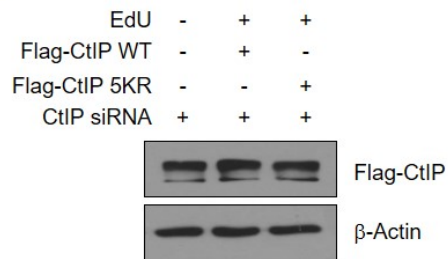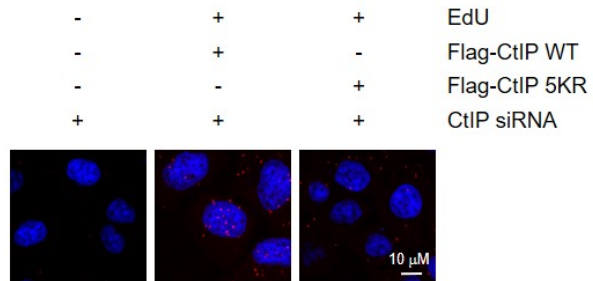**D**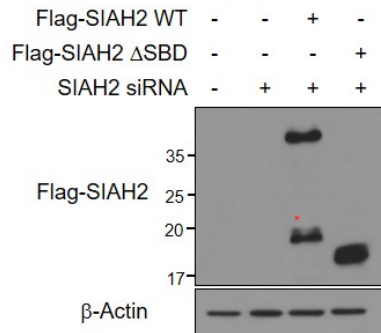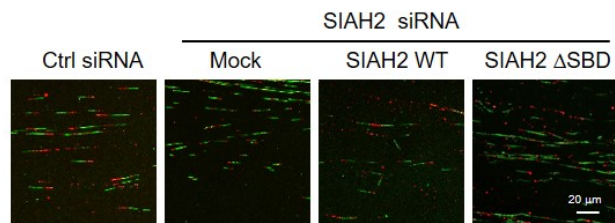

**E**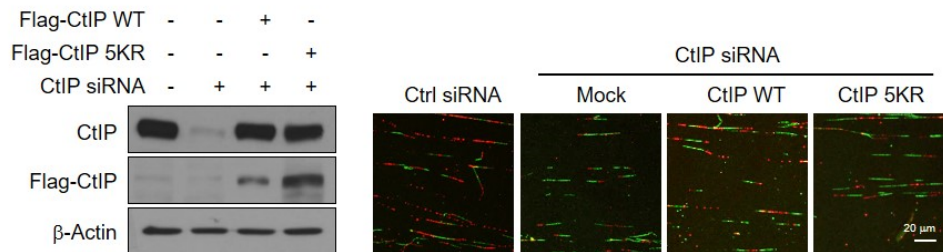**F**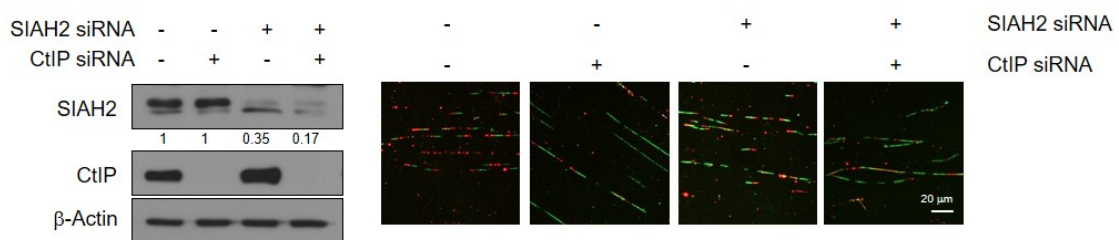**G**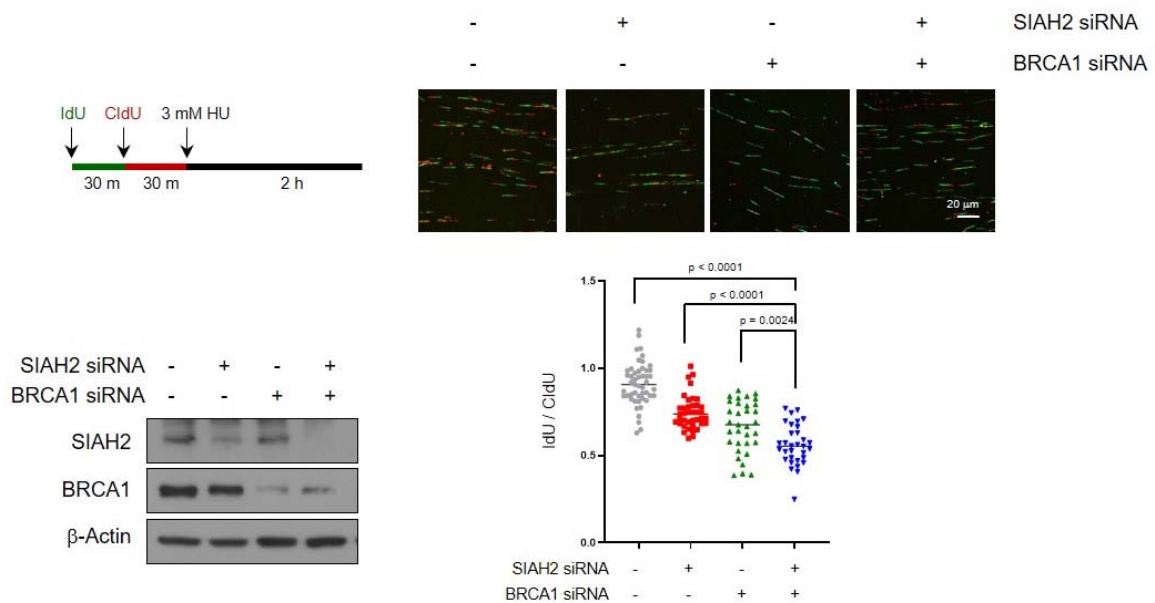**Figure S5. SIAH2 contributes to replication fork restart through CtIP.**

(A) Control HeLa cells, SIAH2-depleted HeLa cells, and SIAH2-depleted HeLa cells reconstituted with Flag-SIAH2 were pulse labeled with EdU for 10 min, followed by 10 mM HU treatment for

3 h. Localization of CtIP at the nascent forks was detected through the SIRF assay. Whole cell lysates were analyzed by western blotting using the indicated antibodies. Representative images are shown. **(B and C)** Localization of CtIP at the nascent forks, measured using the assay described in **(A)**, in SIAH2-depleted HeLa cells reconstituted with either Flag-SIAH2 WT or Flag-SIAH2  $\Delta$ SBD **(B)** and CtIP-depleted HeLa cells reconstituted with either Flag-CtIP WT or Flag-CtIP-5KR **(C)**. Whole cell lysates were analyzed by western blotting using the indicated antibodies. Representative images are shown. **(D-F)** Double-labeled DNA fibers in control HeLa cells or SIAH2-depleted HeLa cells reconstituted with Flag-Mock, Flag-SIAH2 WT, or Flag-SIAH2  $\Delta$ SBD **(D)**, control HeLa cells or CtIP-depleted HeLa cells reconstituted with Flag-Mock, Flag-CtIP WT, or Flag-CtIP-5KR **(E)**, and control HeLa cells or HeLa cells transfected with the indicated siRNA combinations **(F)** to quantify stalled replication forks. Whole cell lysates were analyzed by western blotting using the indicated antibodies. Representative images are shown. **(G)** Double-labeled DNA fibers in control, SIAH2-depleted, BRCA1-depleted, and SIAH2 and BRCA1-co-depleted HeLa cells to quantify fork degradation. Whole cell lysates were analyzed by western blotting using the indicated antibodies. Representative images are shown. Data are presented as means  $\pm$  SD ( $n = 3$ ). *P* values between indicated samples were calculated using a Mann-Whitney test.

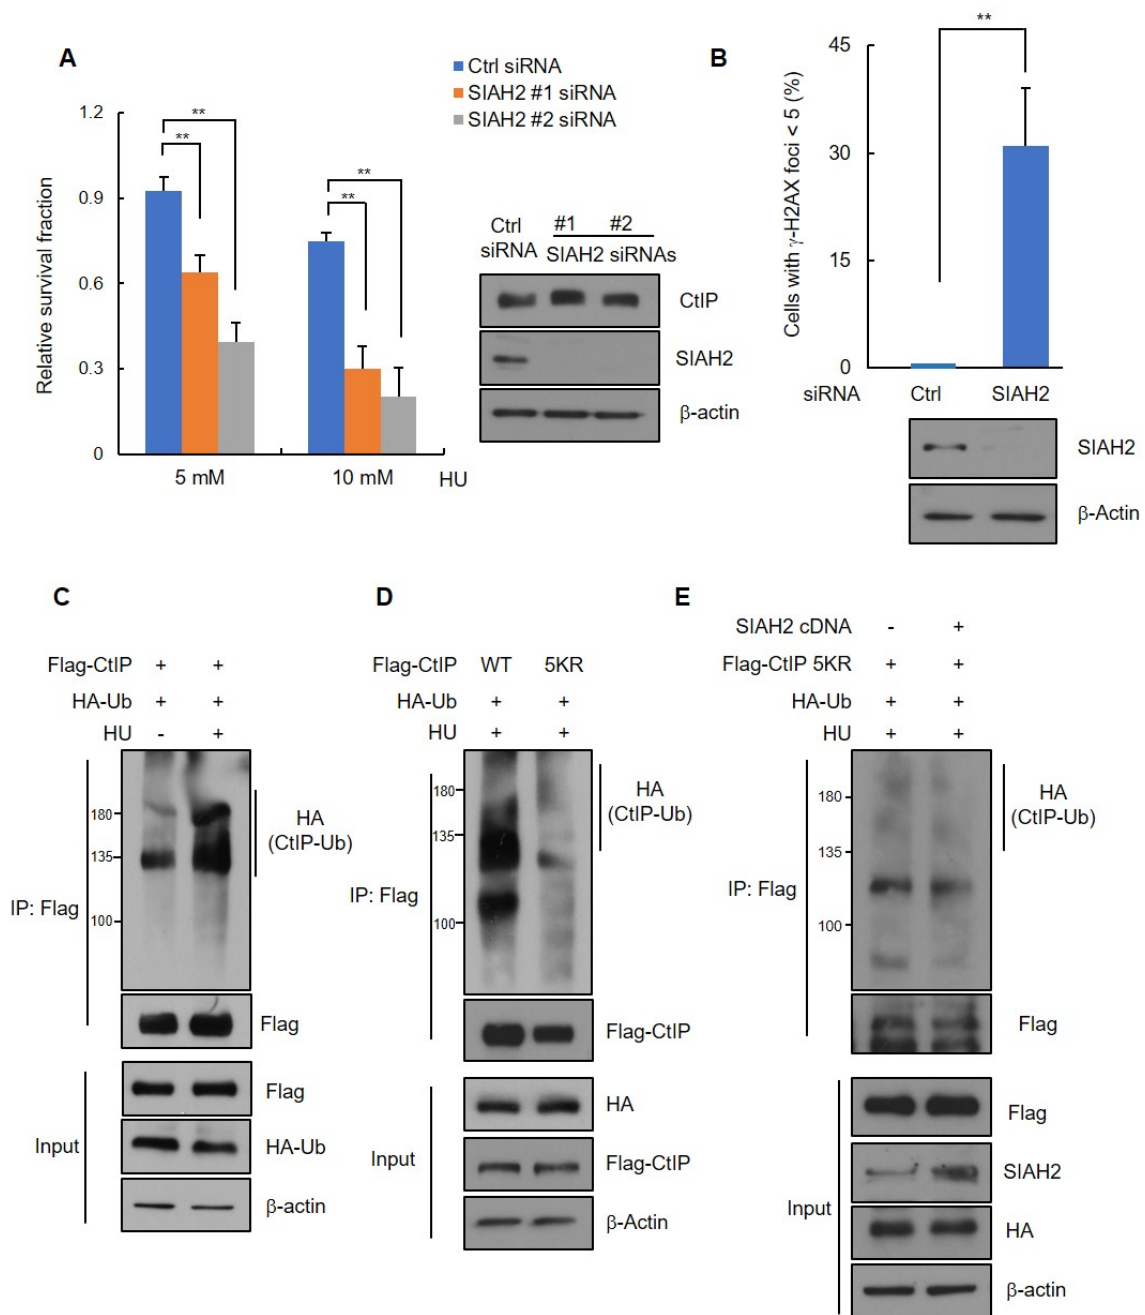

**Figure S6. CtIP is ubiquitinated in response to replication stress.**

(A) Colony-forming ability of control and SIAH2 knockdown cells treated with the indicated doses of HU for 3 h. Whole cell lysates were analyzed by immunoblotting using the indicated antibodies. Survival data is presented as mean  $\pm$  SD ( $n = 3$ ), \*\*  $P < 0.01$ . Statistical analysis was performed with the two-tailed Student's  $t$ -test. (B) Control- and SIAH2-depleted HeLa cells were treated with



3 mM HU for 24 h and then fixed and immunostained for  $\gamma$ -H2AX. The percentage of cells with > 5 foci for  $\gamma$ -H2AX is shown. Data represent mean  $\pm$  SD (n = 3), \*\*  $P < 0.01$ . Statistical analysis was performed with the two-tailed Student's *t*-test. (C) HEK293T cells transfected with HA-ubiquitin and Flag-CtIP were treated with or without 3 mM HU. 3 h later, total cell lysates were immunoprecipitated with anti-Flag antibody. The immunoprecipitates were then blotted with the indicated antibodies. (D) HEK293T cells were cotransfected with HA-ubiquitin along with Flag-CtIP WT or Flag-CtIP-5KR, treated with 3 mM HU for 3 h, and subjected to immunoprecipitation and immunoblotting as indicated. (E) Flag-CtIP-5KR-expressing HEK293T cells were transfected with HA-ubiquitin with or without SIAH2 and treated with 3 mM HU. 3 h later, total cell lysates were immunoprecipitated with anti-Flag antibody and immunoblotted with the indicated antibodies.

**A**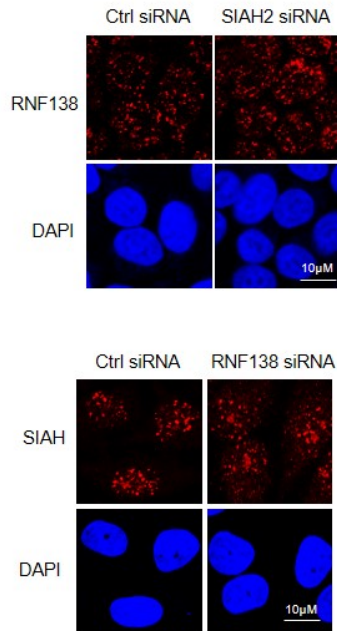**B**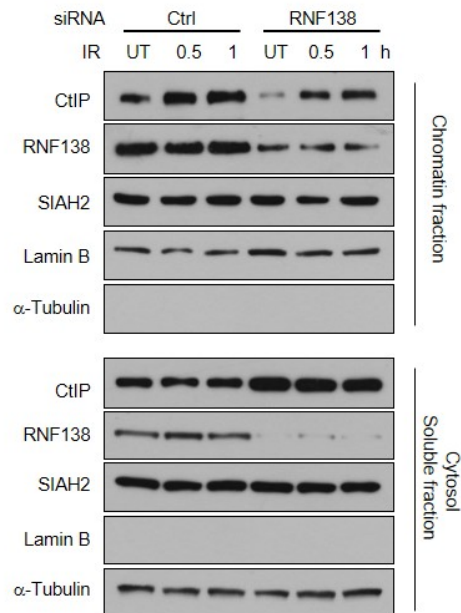

**Figure S7. The effect of RNF138 knockdown on IR-induced SIAH2 foci formation and chromatin retention.**

(A) HeLa cells cotransfected with HA-ubiquitin and either a scrambled negative control siRNA or siRNAs against SIAH2 (left) or RNA138 were treated with 5 Gy IR at 1 h, and immunostained with anti-RNF138 or anbt-SIAH2 antibodies. DNA was stained with DAPI. (B) Control and RNF138-depleted HeLa cells were either untreated or treated with 5 Gy IR. At the indicated time point after IR, chromatin and soluble fractions were extracted and analyzed by western blotting.

**Table S1 List of primer sequences used for RT-PCR, ChIP and cloning.**

| Gene             | Forward primer sequence                                | Reverse primer sequence                              | Used    |
|------------------|--------------------------------------------------------|------------------------------------------------------|---------|
| HA CtIP WT       | CGGATATCCGATGAACATCTTGGGA                              | ACGCGTCGACCTATGTCTTCTGCTC                            | cloning |
| HA CtIP-500      | CGCGAATTCATTCAGCGTCAAGAG                               | CGCCTCGAGCTATGTCTTCTGCTCCTT                          | cloning |
| HA CtIP-600      | CGCGAATTCCTTAGATGACATAAAGAGTGC                         | CGCCTCGAGCTATGTCTTCTGCTCCTT                          | cloning |
| HA CtIP-700      | CGCGAATTCCTCTTAAAAATGAAGAAGC                           | CGCCTCGAGCTATGTCTTCTGCTCCTT                          | cloning |
| HA CtIP-800      | CGCGAATTCGGAAAAAAGAGGAG                                | CGCCTCGAGCTATGTCTTCTGCTCCTT                          | cloning |
| Flag SIAH2 ΔRING | 1. GCGATCGC ATGAGCCGCCCGT<br>2. GGCGCCCTGACGCCCAGCATCA | 1. CGAAGAGCGAGGTCAGCTCGT<br>2. ACGCGTTGGACAACATGTAGA | cloning |
| Flag SIAH2 ΔZINC | 1. GCGATCGC ATGAGCCGCCCGT<br>2. AGCATTACCACCTTCAGGGA   | 1. CGAGGCCACCTTCTCCATAGC<br>2. ACGCGTTGGACAACATGTAGA | cloning |
| Flag SIAH2 ΔSBD  | GCGATCGC ATGAGCCGCCCGT                                 | AACGCGTACGCGTTGGACAACA                               | cloning |
| GST SIAH2 SBD    | AAAGAATTCCACGCCACAAGAGCA                               | GCGGCCGCATGTAGAAATAGTAACA                            | cloning |
| GST SIAH2 ΔSBD   | AAAGAATTCCACGCCACAAGAGCA                               | AAAAGCGGCCCGCTGGACAACA                               | cloning |
| GST SIAH2 WT     | AAAGAATTCATGAGCCGCCCGTCTCCA<br>C                       | GCCCTCGAGTGGACAACATGTAGAAAT<br>AG                    | cloning |
| GST CtIP 700-799 | CGCGAATTCCTCTTAAAAATGAAGAAGC                           | ATTAAGCGGCCGCTTCTTCTCTCC                             | cloning |
| GFP-SIAH1        | AAACTCGAGATGAGCCGTCAGACT                               | CCCGAATTCACACATGGAAATA                               | cloning |
| No DSB           | ATTGGGTATCTGCGTCTAGTGAGG                               | GACTCAATTACATCCCTGCAGCT                              | RT-PCR  |
| DSB-335nt        | GAATCGGATCTATGCGACTGATC-3                              | TTCCAAAGTTATTCCAACCCGAT                              | RT-PCR  |
| DSB-1618nt       | TGAGGTGACATTAGAACTCAGA                                 | AGGACTCACTTACACGGCCTTT                               | RT-PCR  |
| DSB-3500nt       | TCCTAGCCAGATAATAATAGCTATACAA<br>ACA                    | TGAATAGACAGACAACAGATAAAATGA<br>GACA                  | RT-PCR  |
| ISeq1 180        | CATGCCCCGAAGGCTACGT                                    | CGGCGCGGGTCTTGTA                                     | ChIP    |
| Flag CtIP 5KR    | GAAGAATTCCTCACCAGAAATCAACAGC<br>TGAGGG (K62R)          | CCCTCAGCTGTTGATTCTTGGTGAAGA<br>ATTCTTC (K62R)        | cloning |
|                  | GTCCTTCATGAAACCATTAGAGTTTTAG<br>AAGATCGG (K78R)        | CCGATCTTCTAAAACCTAATGGTTTCA<br>TGAAGGAC (K78R)       | cloning |
|                  | CCGGCAGCAGAATCTTAGACTTATTACA<br>GAACTT (K115R)         | AAGTTCTGTAATAAGTCTAAGATTCTG<br>CTGCCGG (K115R)       | cloning |
|                  | CTACAGGAAGAAAATAGAAGGCTTTCTG<br>AACAACTCC (K132/133R)  | GGAGTTGTTGAGAAAGCCTTCTATTTTC<br>TTCTGTAG (K132/133R) | cloning |
| Flag-CtIP-6KR    | TGCTCTCCAGACAATCGACCATCATTAC<br>AAATA (K572R)          | TATTTGTAATGATGGTCGATTGTCTGGA<br>GAGCA (K572R)        | cloning |
|                  | CCATCATTACAAATAAGAGAAGAAAATG<br>CTGTC (K578R)          | GACAGCATTTTCTTCTTATTTGTAAT<br>GATGG (K578R)          | cloning |
|                  | AGAACTGGTAAAATAAGGTCTTACAAA<br>ACAAC (K640R)           | GTTGTTTTGTAGAGACCTTATTTACCA<br>GTTCT (K640R)         | cloning |
|                  | GTCTACTGCCACAAGGAGACTACACACT<br>CATG (K759/760R)       | CATGAGTGTGTAGTCTCCTTGTGGCAG<br>TAGAC (K759/760R)     | cloning |
|                  | GTGGAGCCGTATTTAGAGGTGATGAAA<br>GAGAG (K782R)           | CTCTCTTTCATCACCTCTAAAATACGGC<br>TCCAC (K782R)        | cloning |

**Table S2. List of antibodies used in this study: WB, IP, IF.**

| Antibody                                                      | Species        | Application | Cat. No                                                                                  | Suppliers         |
|---------------------------------------------------------------|----------------|-------------|------------------------------------------------------------------------------------------|-------------------|
| SIAH2                                                         | rabbit, human  | WB, IP, IF  | PAB8469                                                                                  | Abnova            |
| SIAH1                                                         | rabbit, human  | WB          | PAB10383                                                                                 | Abnova            |
| CtIP                                                          | monkey, human  | WB, IP      | 9201S                                                                                    | Cell signaling    |
| CtIP                                                          | human          | ChIP        | 61141                                                                                    | Active motif      |
| CtIP                                                          | mouse, human   | IF          | sc-5970                                                                                  | Santa Cruz        |
| CtIP                                                          | mouse, human   | WB          | sc-271339                                                                                | Santa Cruz        |
| CtIP                                                          | human          | WB          | a kind gift from professor Richard Baer, university of Texas Southwestern Medical Center |                   |
| Flag                                                          | mouse, human   | WB, IP      | F7425                                                                                    | Sigma-Aldrich     |
| HA                                                            | rabbit, human  | WB, IP      | 3724S                                                                                    | Cell Signaling    |
| HA                                                            | rabbit, human  | WB, IP      | NB600-363                                                                                | NOVUS Biologicals |
| GFP                                                           | rabbit, human  | WB          | NB600-308                                                                                | NOVUS Biologicals |
| RAD51                                                         | mouse, human   | IF          | sc-8349                                                                                  | Santa cruz        |
| RPA32-RPA2                                                    | mouse, human   | IF          | 61184                                                                                    | Abcam             |
| RPA                                                           | hamster, human | IF          | NA18                                                                                     | Calbiochem        |
| $\gamma$ -H2A.X                                               | Vertebrates    | IF          | 05-636                                                                                   | Millipore         |
| $\alpha$ -Tubulin                                             | mouse, human   | WB          | LF-MA0117                                                                                | Abfrontier        |
| $\beta$ -Actin                                                | mouse, human   | WB          | sc-47778                                                                                 | Santa cruz        |
| Cyclin A                                                      | mouse, human   | IF          | sc-271682                                                                                | Santa cruz        |
| Lamin B                                                       | mouse, human   | WB          | sc-6216                                                                                  | Santa cruz        |
| RNF138                                                        | human          | WB          | 92730                                                                                    | Abcam             |
| BRCA1                                                         | mouse, human   | WB          | A301-377A                                                                                | Bethyl            |
| Peroxidase- Affinipure Goat Anti-mouse IgG Fc gamma fragment  | mouse, human   | WB          | 115-035-008                                                                              | Jackson           |
| Peroxidase- Affinipure Goat Anti-rabbit IgG Fc gamma fragment | mouse, human   | WB          | 115-035-008                                                                              | Jackson           |
| Alexa Fluor® 488 chicken anti-rabbit IgG                      | mouse, human   | IF          | A-21441                                                                                  | Invitrogen        |
| Alexa Fluor® 488 chicken anti-mouse IgG                       | mouse, human   | IF          | A-21200                                                                                  | Invitrogen        |
| Alexa Fluor® 594 chicken anti-rabbit IgG                      | mouse, human   | IF          | A-21442                                                                                  | Invitrogen        |
| Alexa Fluor® 594 chicken anti-mouse IgG                       | mouse, human   | IF          | A-21201                                                                                  | Invitrogen        |
| Alexa Fluor® 594 chicken anti-goat IgG                        | mouse, human   | IF          | A-21468                                                                                  | Invitrogen        |
| IgG from mouse serum                                          | mouse, human   | IP, IF      | I5381                                                                                    | Sigma-Aldrich     |
| IgG from Rabbit serum                                         | mouse, human   | IP, IF      | I5006                                                                                    | Sigma-Aldrich     |
